# Supplementary material for: Effect of temperature on the performance of ultrafine MnO2nanobelt supercapacitors
Source: Royal Society of Chemistry journal article supplement (doi:10.1039/c3ta14182a), 2013-11-07
Supplement: c3ta14182a.pdf [file c3ta14182a.pdf]

## Electronic Supplementary Information

### Effect of temperature on the performance of ultrafine MnO<sub>2</sub> nanobelt supercapacitors

Wenyao Li,<sup>ab</sup> Kaibing Xu,<sup>a</sup> Lei An,<sup>a</sup> Feiran Jiang,<sup>a</sup> Xiyang Zhou,<sup>b</sup> Jianmao Yang,<sup>a</sup>

Zhigang Chen,<sup>a</sup> Rujia Zou,<sup>\*a</sup> and Junqing Hu<sup>\*a</sup>

<sup>a</sup>*State Key Laboratory for Modification of Chemical Fibers and Polymer Materials,  
College of Materials Science and Engineering, Donghua University, Shanghai  
201620, China*

<sup>b</sup>*School of material engineering, Shanghai university of engineering science,  
Shanghai 201620, China*

E-mail: [rjzou@dhu.edu.cn](mailto:rjzou@dhu.edu.cn); [hu.junqing@dhu.edu.cn](mailto:hu.junqing@dhu.edu.cn)

## Part I: Calculations

The specific capacitance of the electrode was calculated from the C-V curves according to the following equation<sup>1</sup>:

$$C = \frac{Q}{\Delta V * m}$$

where  $C$  ( $F g^{-1}$ ) is the specific capacitance,  $m$  (g) is the mass of the active materials in the electrodes,  $Q$  (C) is an average charge during the charging and discharging processes, and  $\Delta V$  (V) is the potential window.

The discharge specific capacitance is calculated from the discharge curves using the following formula<sup>1</sup>:

$$C = \frac{I * \Delta t}{m * \Delta V}$$

where  $I$  (A),  $\Delta t$  (s),  $m$  (g), and  $\Delta V$  (V) are the discharge current, discharge time consumed in the potential range of  $\Delta V$ , mass of the active materials, and the potential windows, respectively.

1. J. Yan, E. Khoo, A Sumboja, P. S. LEE. *Acs Nano*, 2010, **4**, 4247-4255.

## Part II: Supplementary Figures

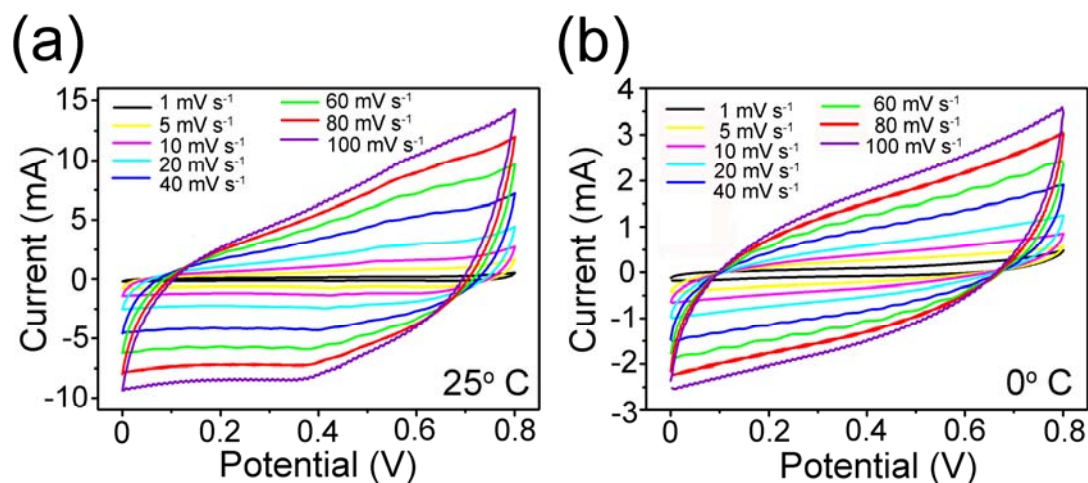

**Fig. S1** Cyclic voltammetry (CV) curves of the MnO<sub>2</sub> nanobelts at different scan rates with (a) 25 °C and (b) 0 °C.

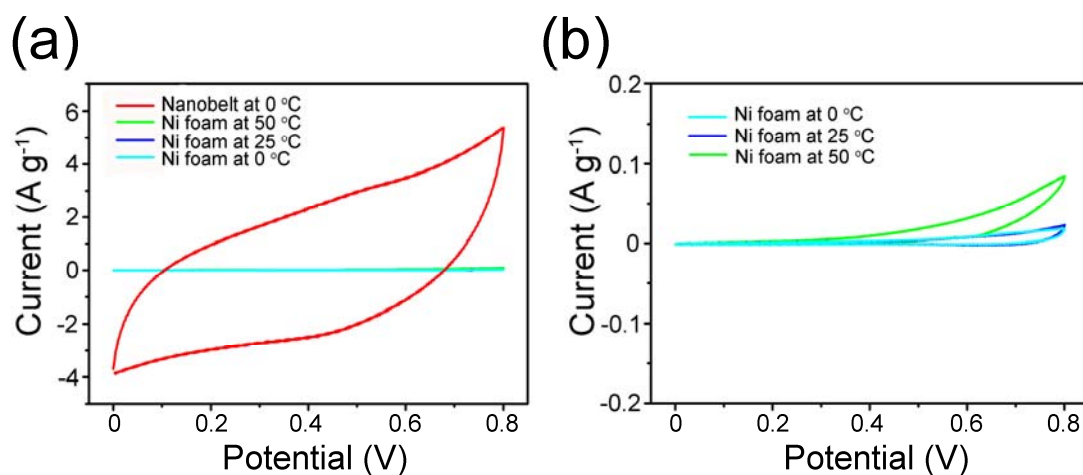

**Fig. S2** (a) CV curves comparison of the Ni substrate at different temperatures and MnO<sub>2</sub> nanobelts at 0 °C, at a scan rate of 50 mV s<sup>-1</sup>. (b) Enlarged CV curves of Ni substrate in (a) at different temperatures.

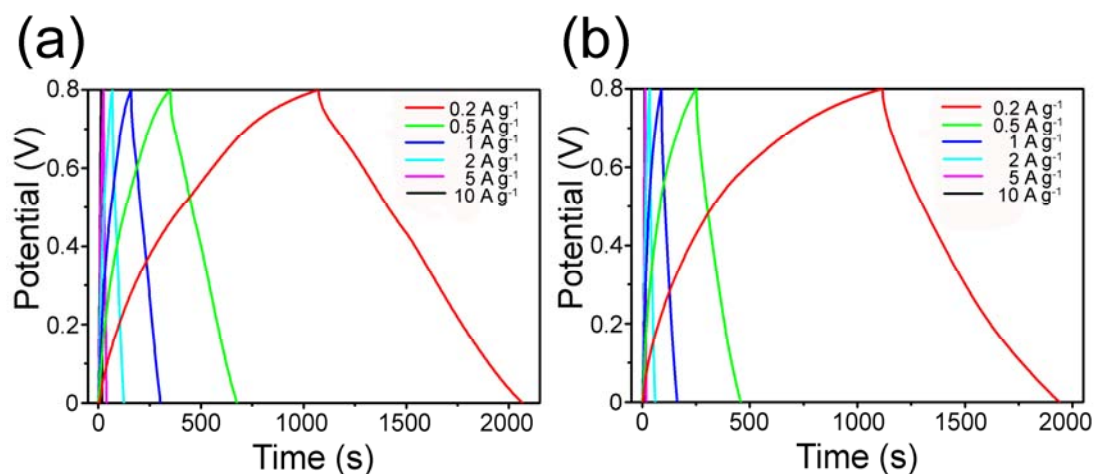

**Fig. S3** Galvanostatic charge-discharge curves of the MnO<sub>2</sub> nanobelts with different current densities at (a) 25 °C and (b) 0 °C.
